# Supplementary material for: Lidocaine Sensitizes the Cytotoxicity of Cisplatin in Breast Cancer Cells via Up-Regulation of RARβ2 and RASSF1A Demethylation
Source: MDPI journal article supplement (doi:10.3390/ijms151223519), 2014-12-17

# Supplementary Information

**Figure S1.** FACScan flow cytometer analysis of MCF-7 cells post various treatments.

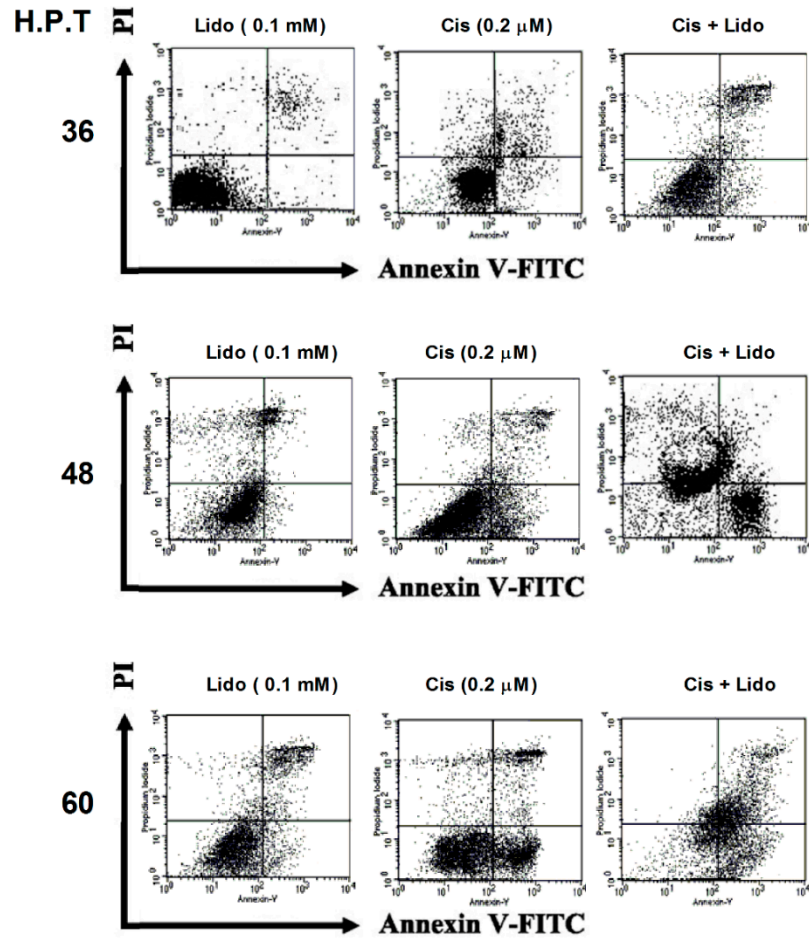

**Figure S2.** Influence of siRNA transfection on cell apoptosis. \*  $p < 0.05$ , ns: no significance.

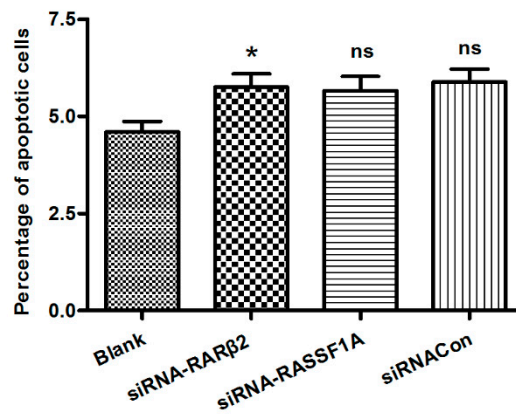

Supplement: s1 [file s1]
